# Supplementary material
Source: PubMed Central journal article supplement (PMC2640156)

## Supplementary data

**Figure S1.** Impact of the insertional mutation in *waaF* and *kpsS* on the production of CPS and LOS in *C. jejuni* 11168. Detection of LOS (a) and CPS (b) in wild-type 11168 (WT) and its derivatives. The surface polysaccharides were separated by SDS-PAGE and visualized by Alcian Blue staining. JB301, a CPS mutant (*kpsS::aphA3*); JB302, a LOS mutant (*waaF::tetO*); JB303, a CPS and LOS double mutant (*waaF::tetO, kpsS::aphA3*); JB302C, JB302 harbouring pRY112::*waaF*.

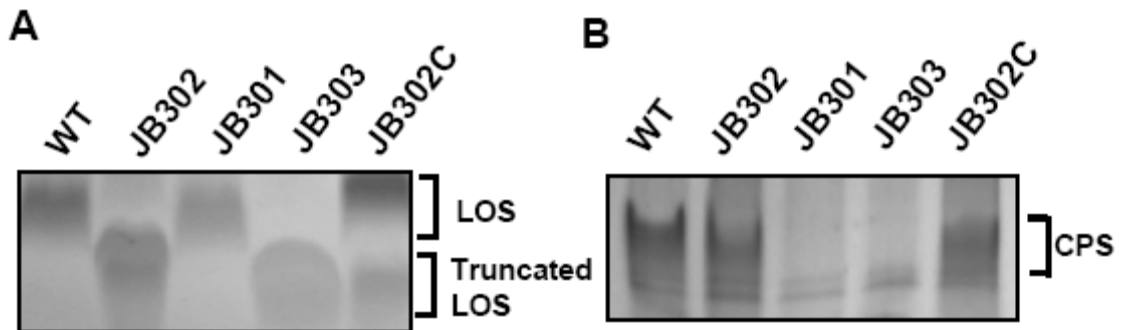

Supplement: dkn529_1.pdf [file dkn529_1.pdf]
